# Supplementary material for: Nerve growth factor receptors in equine synovial membranes vary with osteoarthritic disease severity
Source: PubMed Central journal article supplement — J Orthop Res. 2022 May 31;41(2):316–24. doi: 10.1002/jor.25382 (PMC10084167; doi:10.1002/jor.25382), 2022-05-31
Supplement: JOR-41-316-s001.pdf [file JOR-41-316-s001.pdf]

Horse number

Isotype

TrkA

p75<sup>NTR</sup>

BAX

14

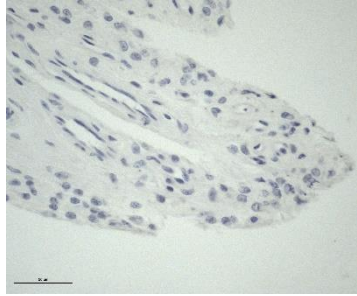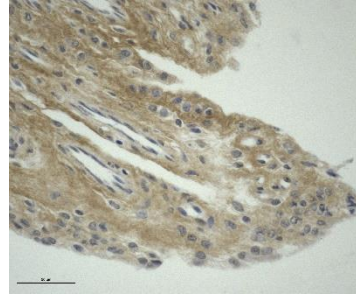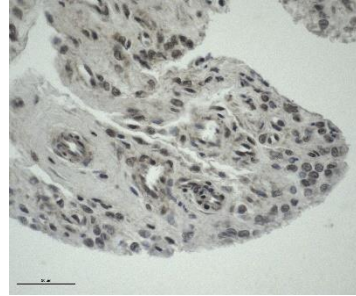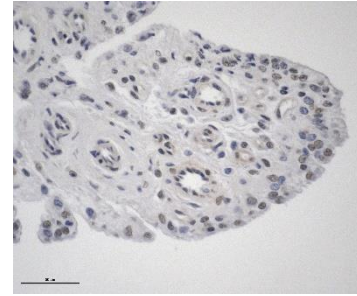

15

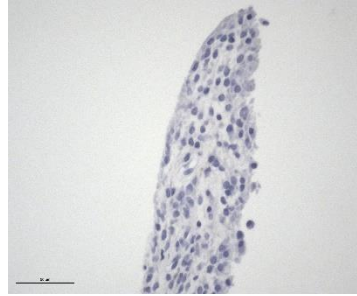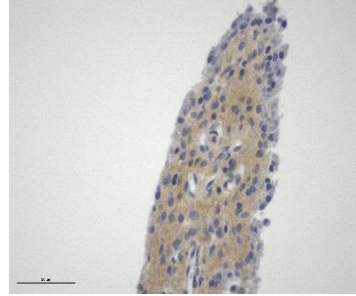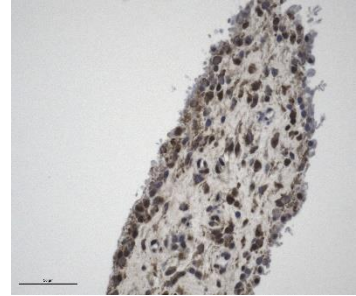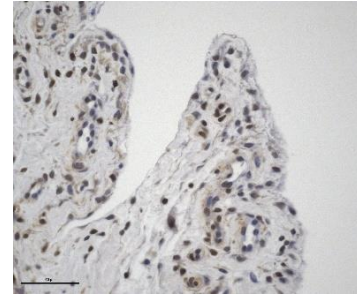

16

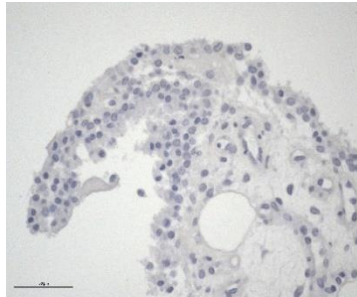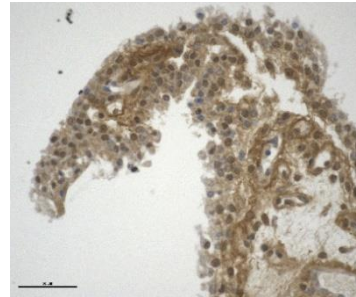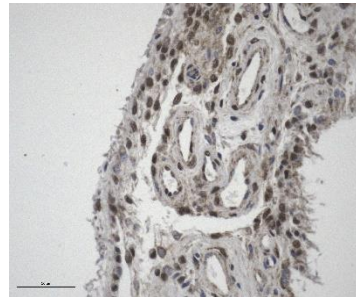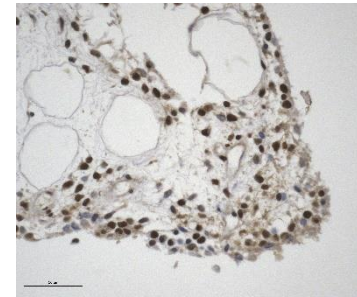

17

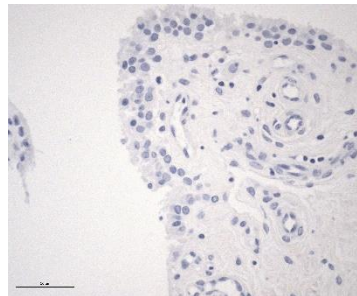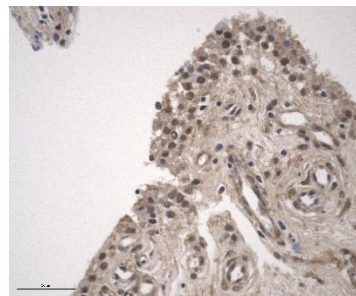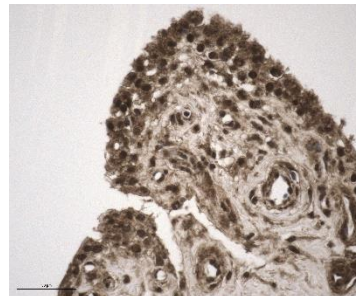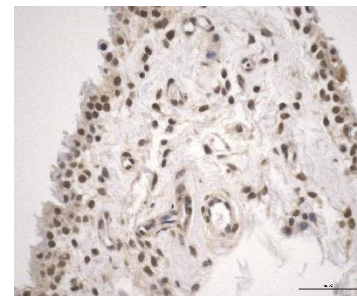

Expression of TrkA, p75<sup>NTR</sup> and BAX in synovial membranes from horses with intra-carpal fractures (n=4). The isotype example is from the TrkA experiment, representative of all isotype controls. (x40, scale bar indicates 50µm)  
Demographic data is supplied in table S-1
